# Supplementary material for: How Alligator Immune Peptides Kill Gram-Negative Bacteria: A Lipid-Scrambling, Squeezing, and Extracting Mechanism Revealed by Theoretical Simulations
Source: MDPI journal article supplement (doi:10.3390/ijms241310962), 2023-06-30
Supplement: s1 [file s1]

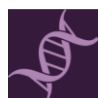

## Supporting Information for

# How alligator immune peptides kill Gram-negative bacteria: A lipid-scrambling, squeezing, and extracting mechanism revealed by theoretical simulations

Xiangyuan Li <sup>1, #</sup>, Lei Fu <sup>1, #</sup>, Shan Zhang<sup>1</sup>, Yipeng Wang<sup>2</sup>, and Lianghui Gao<sup>1, \*</sup>

This file includes:

Table S1

Figure S1 to S5

**Table S1.** Coarse-grained bead types of POPE, POPG, Re-LPS, AS4-1, AS4-5, and AS4-9 corresponding to the coarse-grained mapping scheme in Figure S1 and Figure S2.

| POPE   |      | POPG   |      | Re-LPS |      |        |      |        |      |
|--------|------|--------|------|--------|------|--------|------|--------|------|
| number | type |
| 1      | Qd   | 1      | P4   | 1      | Qa   | 15     | C1   | 29     | Na   |
| 2      | Qa   | 2      | Qa   | 2      | P2   | 16     | C1   | 30     | Nda  |
| 3      | Na   | 3      | Na   | 3      | Nda  | 17     | Na   | 31     | C1   |
| 4      | Na   | 4      | Na   | 4      | P1   | 18     | Na   | 32     | C1   |
| 5      | C1   | 5      | C1   | 5      | P2   | 19     | C1   | 33     | Qa   |
| 6      | C3   | 6      | C3   | 6      | P1   | 20     | C1   | 34     | SC1  |
| 7      | C1   | 7      | C1   | 7      | Nda  | 21     | C1   | 35     | P2   |
| 8      | C1   | 8      | C1   | 8      | Qa   | 22     | C1   | 36     | SN0  |
| 9      | C1   | 9      | C1   | 9      | Na   | 23     | C1   | 37     | P4   |
| 10     | C1   | 10     | C1   | 10     | Na   | 24     | C1   | 38     | SC1  |
| 11     | C1   | 11     | C1   | 11     | C1   | 25     | Na   | 39     | P2   |
| 12     | C1   | 12     | C1   | 12     | C1   | 26     | Nda  | 40     | SN0  |
|        |      |        |      | 13     | C1   | 27     | C1   | 41     | P4   |
|        |      |        |      | 14     | C1   | 28     | C1   | 42     | Qa   |

  

| AS4-1  |      |         | AS4-5  |      |         | AS4-9  |      |         |
|--------|------|---------|--------|------|---------|--------|------|---------|
| number | type | residue | number | type | residue | number | type | residue |
| 1      | Qd   | ARG     | 1      | Qd   | LEU     | 1      | Qd   | LEU     |
| 2      | N0   | ARG     | 2      | AC1  | LEU     | 2      | AC1  | LEU     |
| 3      | Qd   | ARG     | 3      | P5   | GLY     | 3      | P5   | GLY     |
| 4      | P5   | GLY     | 4      | P5   | LEU     | 4      | Nd   | LEU     |
| 5      | P5   | LEU     | 5      | AC1  | LEU     | 5      | AC1  | LEU     |
| 6      | AC1  | LEU     | 6      | P5   | PHE     | 6      | Nda  | PHE     |
| 7      | P5   | PHE     | 7      | SC5  | PHE     | 7      | SC5  | PHE     |
| 8      | SC5  | PHE     | 8      | SC5  | PHE     | 8      | SC5  | PHE     |
| 9      | SC5  | PHE     | 9      | SC5  | PHE     | 9      | SC5  | PHE     |
| 10     | SC5  | PHE     | 10     | P5   | LYS     | 10     | Nda  | LYS     |
| 11     | P5   | LYS     | 11     | C3   | LYS     | 11     | C3   | LYS     |
| 12     | C3   | LYS     | 12     | Qd   | LYS     | 12     | Qd   | LYS     |
| 13     | Qd   | LYS     | 13     | P5   | LYS     | 13     | Nda  | LYS     |
| 14     | P5   | LYS     | 14     | C3   | LYS     | 14     | C3   | LYS     |
| 15     | C3   | LYS     | 15     | Qd   | LYS     | 15     | Qd   | LYS     |
| 16     | Qd   | LYS     | 16     | Nd   | LEU     | 16     | Na   | LEU     |
| 17     | P5   | LEU     | 17     | AC1  | LEU     | 17     | AC1  | LEU     |

|    |     |     |    |     |     |    |     |     |
|----|-----|-----|----|-----|-----|----|-----|-----|
| 18 | AC1 | LEU | 18 | Nd  | LEU | 18 | P5  | LEU |
| 19 | Nda | LEU | 19 | AC1 | LEU | 19 | AC1 | LEU |
| 20 | AC1 | LEU | 20 | Nd  | ARG | 20 | P5  | ARG |
| 21 | Nda | ARG | 21 | N0  | ARG | 21 | N0  | ARG |
| 22 | N0  | ARG | 22 | Qd  | ARG | 22 | Qd  | ARG |
| 23 | Qd  | ARG | 23 | Nd  | LEU | 23 | Nd  | LEU |
| 24 | Nda | LYS | 24 | AC1 | LEU | 24 | AC1 | LEU |
| 25 | C3  | LYS | 25 | N0  | ILE | 25 | Nd  | ILE |
| 26 | Qd  | LYS | 26 | AC1 | ILE | 26 | AC1 | ILE |
| 27 | Nda | ILE | 27 | Na  | LYS | 27 | Nda | LEU |
| 28 | AC1 | ILE | 28 | C3  | LYS | 28 | AC1 | LEU |
| 29 | Nda | LYS | 29 | Qd  | LYS | 29 | Nda | LYS |
| 30 | C3  | LYS | 30 | Na  | LYS | 30 | C3  | LYS |
| 31 | Qd  | LYS | 31 | C3  | LYS | 31 | Qd  | LYS |
| 32 | P5  | LYS | 32 | Qd  | LYS | 32 | Na  | GLY |
| 33 | C3  | LYS | 33 | Na  | GLY | 33 | Na  | PHE |
| 34 | Qd  | LYS | 34 | Na  | PHE | 34 | SC5 | PHE |
| 35 | P5  | GLY | 35 | SC5 | PHE | 35 | SC5 | PHE |
| 36 | P5  | PHE | 36 | SC5 | PHE | 36 | SC5 | PHE |
| 37 | SC5 | PHE | 37 | SC5 | PHE | 37 | P5  | LYS |
| 38 | SC5 | PHE | 38 | P5  | LYS | 38 | C3  | LYS |
| 39 | SC5 | PHE | 39 | C3  | LYS | 39 | Qd  | LYS |
| 40 | P5  | LYS | 40 | Qd  | LYS | 40 | Qa  | LEU |
| 41 | C3  | LYS | 41 | Qa  | LYS | 41 | AC1 | LEU |
| 42 | Qd  | LYS | 42 | C3  | LYS |    |     |     |
| 43 | Qa  | LYS | 43 | Qd  | LYS |    |     |     |
| 44 | C3  | LYS |    |     |     |    |     |     |
| 45 | Qd  | LYS |    |     |     |    |     |     |

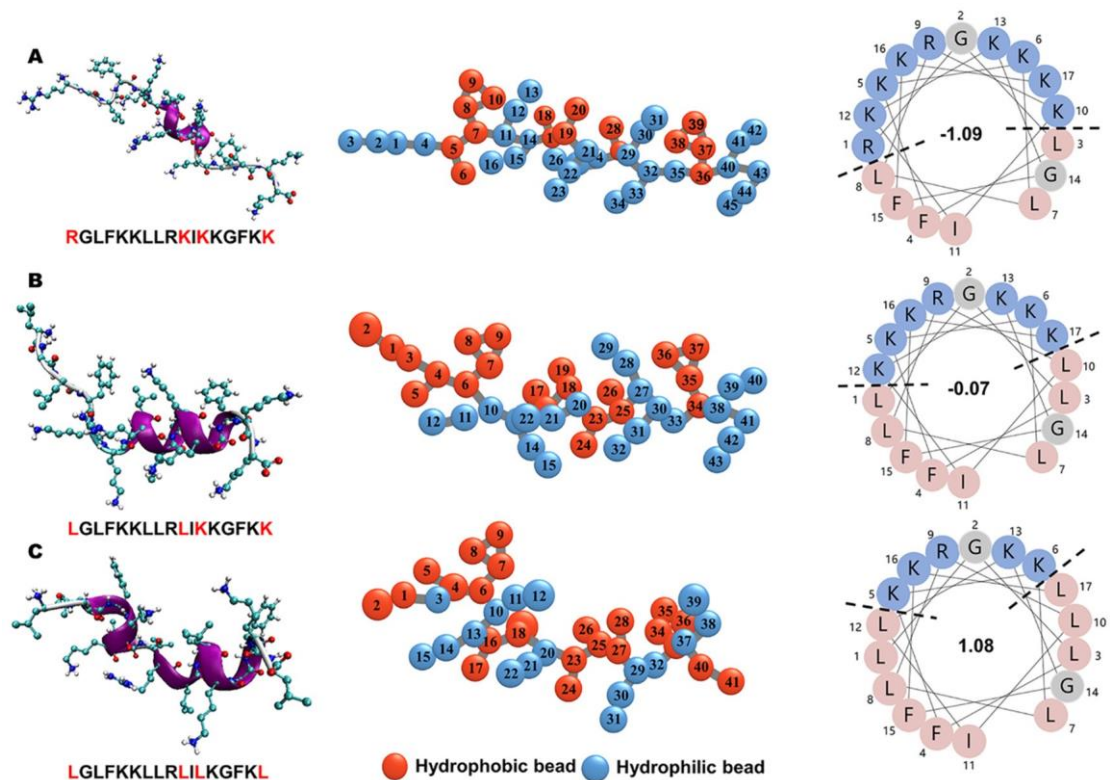

**Figure S1.** Schematic diagram of all-atom (left) and coarse-grained (middle) molecular structures as well as helical wheel representations (right) of (A) AS4-1, (B) AS4-5, and (C) AS4-9. In the coarse-grained models, hydrophilic residues are represented by blue beads and hydrophobic residues are represented by red beads. In the helical wheels, the hydrophilic residues are shown in blue and hydrophobic residues are shown in light pink. The sequence numbers corresponding to the residues and coarse-grained bead types are given in Table S1.

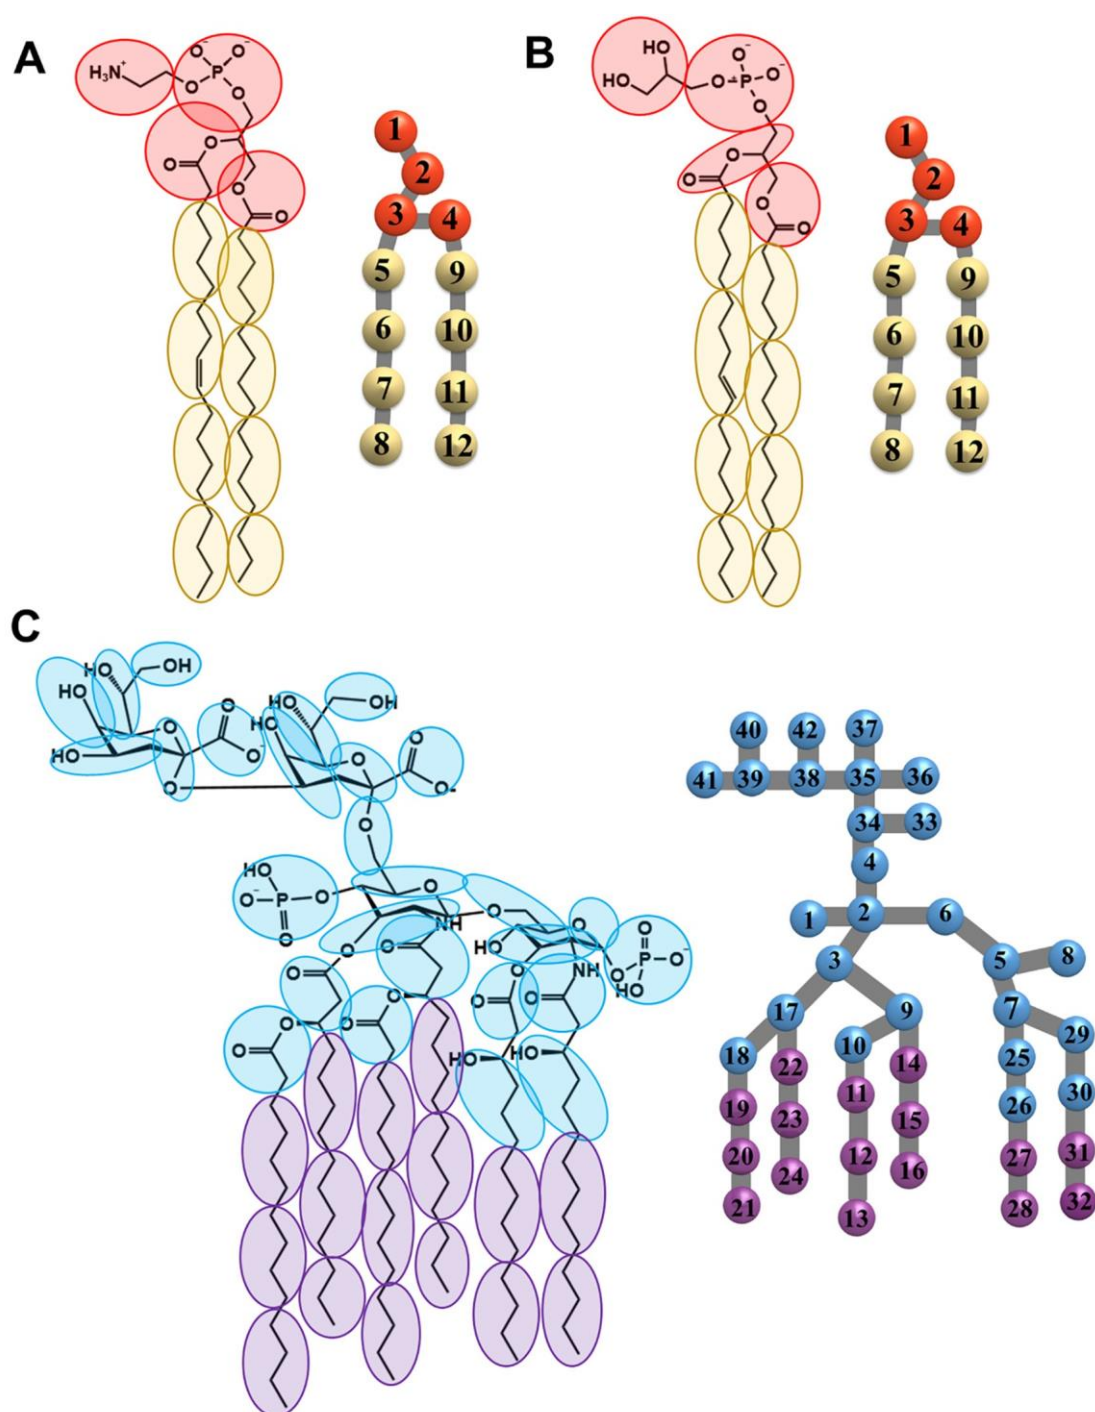

**Figure S2.** Molecular structures of POPE (A), POPG (B), and Re-LPS (C) and their corresponding coarse-grained mappings. For POPE and POPG, the coarse-grained hydrophilic head beads are in red; the hydrophobic tail beads are in yellow. For Re-LPS, the hydrophilic head beads are in cyan, and the hydrophobic tail beads are in purple.



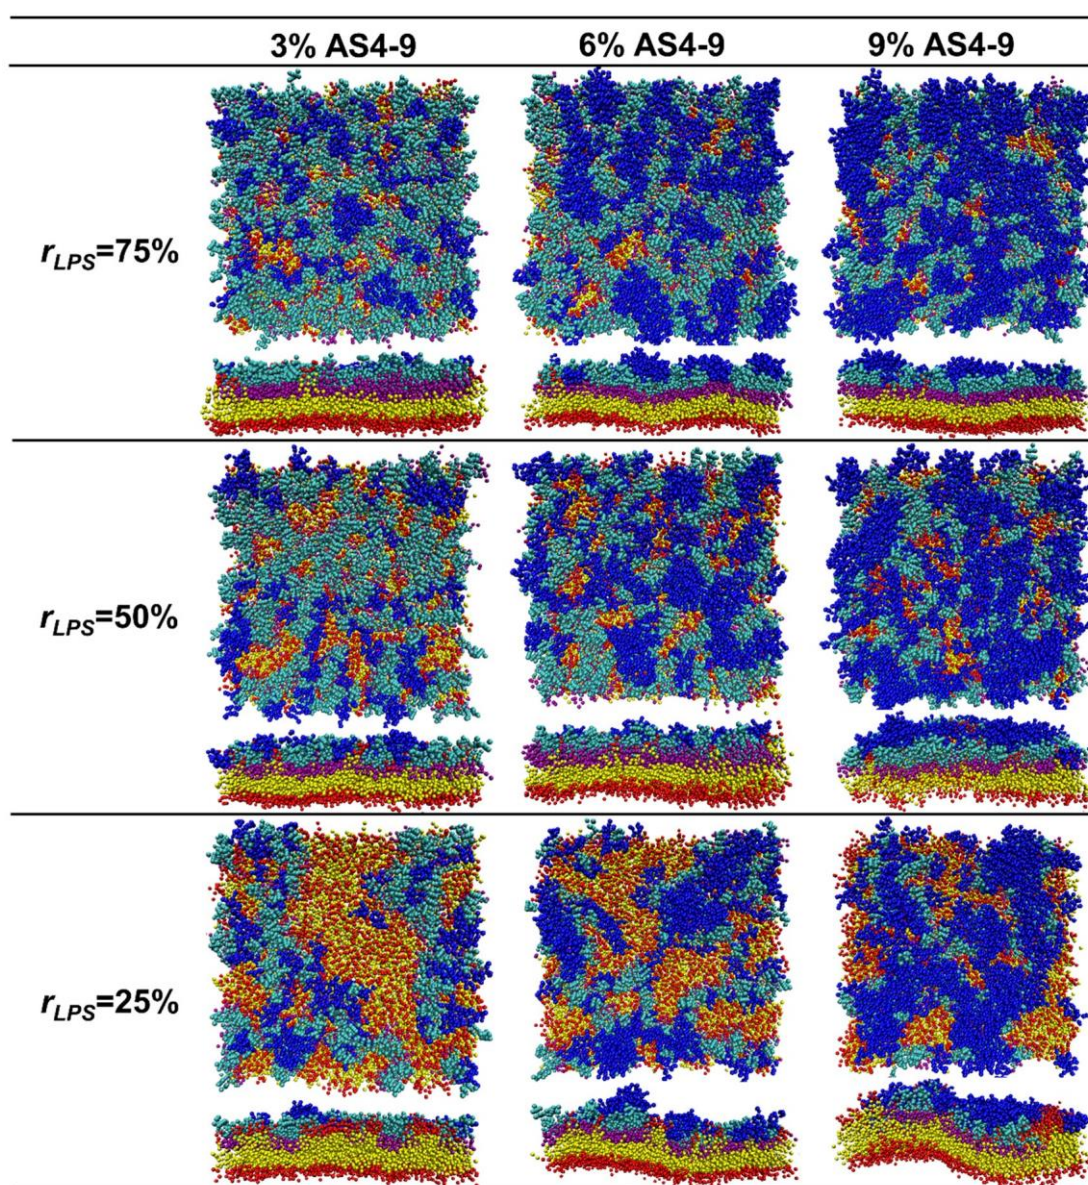

**Figure S3.** Top and side views of snapshots of AS4-9-treated scrambled OM with varying deficiencies of Re-LPS.

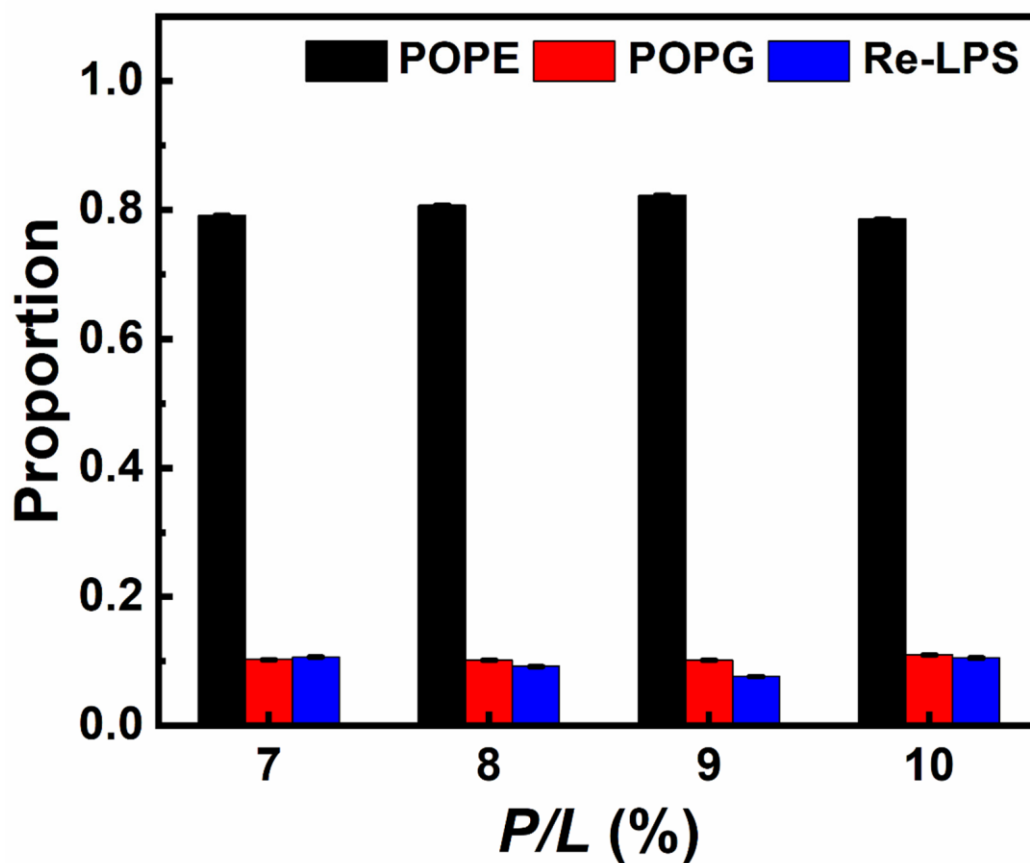

**Figure S4.** Proportion of different lipids in the buds of lipid-scrambled OM ( $rLPS = 10\%$ ) treated with AS4-9.

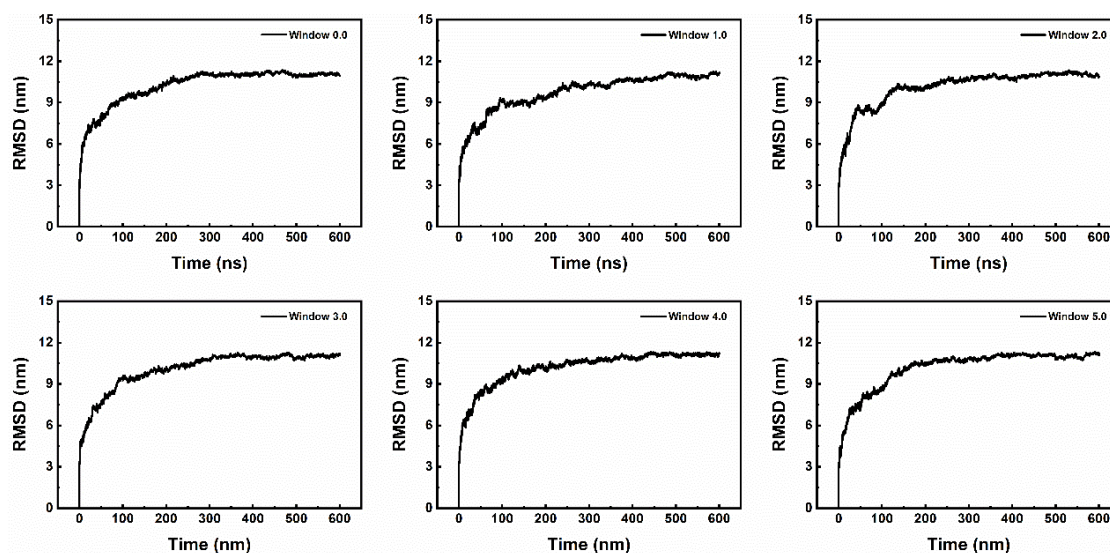

**Figure S5.** Root-mean-square-deviation (RMSD) of the OM in different windows for a POPE flipping from the phospholipid leaflet to the Re-LPS leaflet bound by AS4-9 at the peptide concentration of  $P/L = 3\%$ .
